# Supplementary material
Source: PubMed Central journal article supplement (PMC4068520)
Supplement: AAC.02636-13_zac007143039so1.pdf [file AAC.02636-13_zac007143039so1.pdf]

## Supplementary Materials and Methods

**Patient data.** Patients who suffered breakthrough bacteremia due to the combination of CRAb and a carbapenem-susceptible pathogen during carbapenem therapy were identified from a database of *A. baumannii* bacteremia collected in Taipei Veterans General Hospital from 2000 to 2008. Sources of bacteremia were determined according to recommendations by the U.S. CDC (1).

**Supplementary Table 1** Clinical characteristics of patients with polymicrobial bacteremia caused by carbapenem-resistant *Acinetobacter baumannii* and other carbapenem-susceptible bacteria during carbapenem therapy

| Patient No. | Age/sex | Underlying conditions                               | Source of bacteremia | <i>A. baumannii</i> /CHDL gene and upstream IS <sup>a</sup> /plasmid location/ IPM MIC (mg/L) | Concomitant bacteria/ IPM MIC (mg/L)  | Antimicrobial therapy <sup>b</sup> | Patient outcome <sup>c</sup> |
|-------------|---------|-----------------------------------------------------|----------------------|-----------------------------------------------------------------------------------------------|---------------------------------------|------------------------------------|------------------------------|
| 1           | 61/M    | DM. Hepatitis C and alcohol-related liver cirrhosis | Pneumonia            | Ab1969/ISAba3-IS1 008-                                                                        | <i>Escherichia coli</i> Ec1003/ 0.125 | Tigecycline and sulbactam          | Died on day 5                |

|   |      |                                                                                             |                |                                                                         |                                                                            |                  |                  |
|---|------|---------------------------------------------------------------------------------------------|----------------|-------------------------------------------------------------------------|----------------------------------------------------------------------------|------------------|------------------|
|   |      | (Child C). Receipt liver transplantation.                                                   |                | <i>bla</i> <sub>OXA-58</sub> /11-kb plasmid/64                          |                                                                            |                  |                  |
| 2 | 64/F | RA with methotrexate and etanercept therapy. Disseminated TB. Small intestinal perforation. | Pneumonia      | Ab0509/IS <i>Aba1</i> - <i>bla</i> <sub>OXA-82</sub> / 50-kb plasmid/16 | <i>Klebsiella pneumoniae</i> KpTL425/0.25                                  | IPM and amikacin | Died on day 8    |
| 3 | 78/M | Aortic dissection with 2terna wound infection. Hypertension. CAD. Chronic renal failure.    | Surgical wound | Ab0505/IS <i>Aba1</i> - <i>bla</i> <sub>OXA-82</sub> / 50-kb plasmid/32 | <i>Pseudomonas aeruginosa</i> PaTL424/2                                    | Nil              | Died on day 2    |
| 4 | 72/M | ESRD, under regular haemodialysis. Hypertension. CAD. Old CVA.                              | Pneumonia      | Ab1203/IS <i>Aba1</i> - <i>bla</i> <sub>OXA-172</sub> /50 kb plasmid/32 | <i>Proteus mirabilis</i> Pm1231/ 1; ESBL-producing <i>E. coli</i> Ec1231/1 | Nil              | Died on same day |

CHDL, carbapenem-hydrolysing class D  $\beta$ -lactamase; IS, insertion sequence; IPM, imipenem; M, male; DM, diabetes mellitus; F, female; RA, rheumatoid arthritis; TB, tuberculosis; CAD, coronary arterial disease; ESRD, end-stage renal disease; CVA, cerebral vascular accident; ESBL, extended-spectrum  $\beta$ -lactamase.

<sup>a</sup> The CHDL genes were amplified with LA Taq polymerase (Takara Shuzou, Otsu, Japan), TA cloned into the pCR-TOPOII vector (Invitrogen, Carlsbad, CA), and sequenced by Mission Biotech (Taipei, Taiwan). The localization of the CHDL gene on plasmid was performed as previously described (2).

<sup>b</sup> Antibiotics that were prescribed after culture was available

<sup>c</sup> After bacteremia onset

**Supplementary Table 2.** Primers used in this study<sup>a</sup>

| Primers                      | Sequences, 5' – 3'                  |
|------------------------------|-------------------------------------|
| IS1008( <i>Xba</i> I)F       | tctagaTCTATTTGCAACAGTGCCATTTTTCTT   |
| IS1008 (M- <i>Bam</i> HI)R   | ggatccCATGATATACAACCTTTAAAATTTGG    |
| OXA-58 ( <i>Xho</i> I)R      | ctcgagTTATAAATAATGAAAAACACC         |
| IS1008-ΔP2-1( <i>Xba</i> I)F | tctagaTTGCAACAGTGCCATTTTTCTT        |
| IS1008-ΔP2-2( <i>Xba</i> I)F | CTAGtctagaAACAGTGCCATTTTTCTTTATAC   |
| IS1008-ΔP2-3( <i>Xba</i> I)F | CTAGtctagaACAGTGCCATTTTTCTTTATACTAT |
| ISAbal( <i>Xba</i> I)F       | tctagaCACGAATGCAGAAGTTG             |
| OXA-23-like( <i>Xho</i> I)R  | ctcgagAATAATATTCAGCTGTTTTAATG       |
| OXA-24( <i>Xba</i> I)F       | tctagaCTCTAAGCCCCAAAATTCC           |
| OXA-24-like( <i>Xho</i> I)R  | ctcgagAATGATTCCAAGATTTTCTAGCG       |
| OXA-51-like( <i>Xho</i> I)R  | ctcgagTAAAATACCTAATTGTTCTAA         |
| OXA-58-21( <i>Bam</i> HI)F   | ggatccGAGCATAGTATGAGTCGA            |
| OXA-58-21( <i>Xho</i> I)R    | ctcgagTTATAAATAATGAAAAACACC         |
| Gyrase-A( <i>Kpn</i> I)P1    | ggtaccAAGCATTCATATTTAGATTAC         |
| Gyrase-A( <i>Pst</i> I)P2    | ctcgagCTCTTTTACTAACTCGGC            |

<sup>a</sup> Lower-case letters indicate restriction sites.

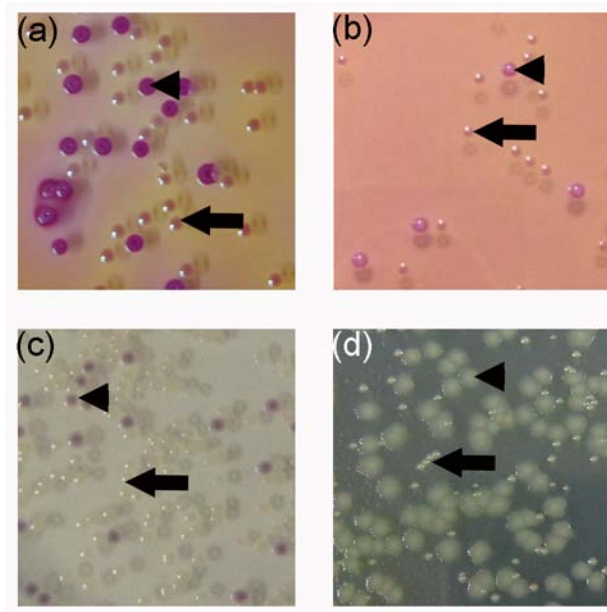

**Supplementary FIG 1.** Differentiation of cocultured bacteria in different agar plates.

Bacteria cocultured in broth containing imipenem were differentiated by their colony characteristics on appropriate agar plates. *Acinetobacter baumannii* strain Ab290 (pOXA-58-2) (arrow) was differentiated from *Escherichia coli* strain Ec1003 (A, arrowhead) and *Klebsiella pneumoniae* strain KpTL425 (B, arrowhead) on MacConkey agar (Becton Dickinson and Company, Franklin Lakes, NJ). Ab290 (pOXA-58-2) (arrow) was differentiated from *Enterobacter cloacae* strain EntC YT240 (C, arrowhead) on Harlequin *E. coli*/Coliform medium (LabM, Lancashire, UK) and from *Pseudomonas aeruginosa* strain PaTL424 (D, arrowhead) on Mueller-Hinton agar (Becton Dickinson and Company).

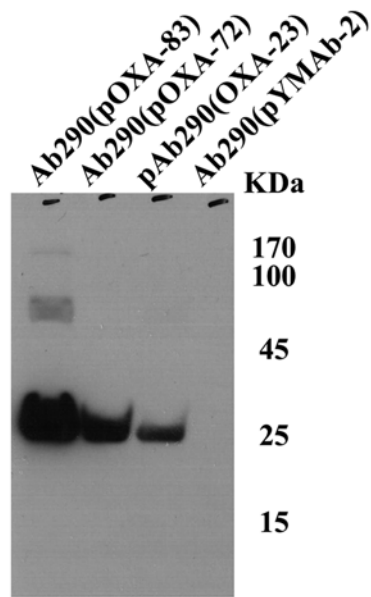

**Supplementary FIG 2.** Detection of other carbapenem-hydrolysing class D  $\beta$ -lactamases in extracellular fractions from *A. baumannii*. Extracellular localizations of His-tagged OXA-83, OXA-72, and OXA-23 were detected using an anti-His antibody. Extracellular fractions of transformants bearing the shuttle vector pYMAb-2 were used as negative controls.

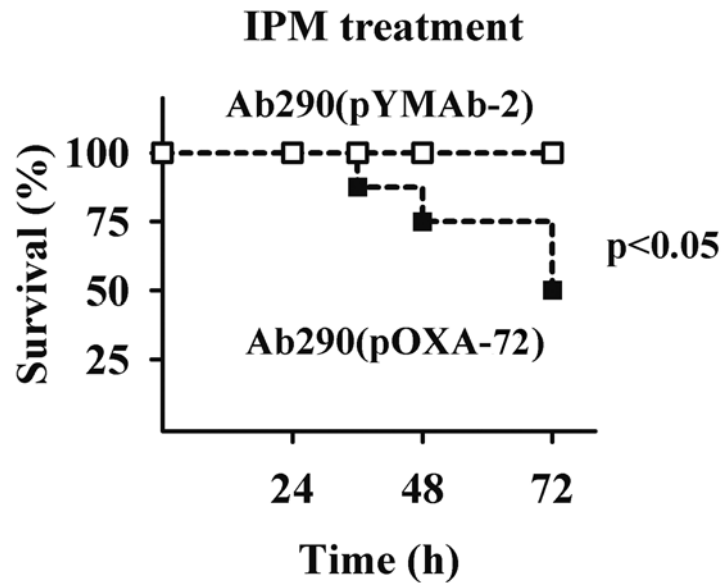

**Supplementary FIG 3.** Co-infection with *Escherichia coli* and *Acinetobacter baumannii* producing OXA-72 enhances the pathogenesis of polymicrobial infection in the presence of carbapenem therapy. The 48-h mortality was significantly higher in mice co-infected with Ec1003 and Ab290(pOXA-72) than in those co-infected with Ec1003 and Ab290 carrying a shuttle vector (pYMAb-2).

#### References

1. **Garner JS, Jarvis WR, Emori TG, Horan TC, Hughes JM.** 1988. CDC definitions for nosocomial infections, 1988. *Am J Infect Control* **16**:128-140.
2. **Chen TL, Chang WC, Kuo SC, Lee YT, Chen CP, Siu LK, Cho WL, Fung CP.** 2010. Contribution of a plasmid-borne *bla*<sub>OXA-58</sub> gene with its hybrid promoter provided by IS1006 and an IS*Aba3*-like element to beta-lactam resistance in *Acinetobacter* genomic species 13TU. *Antimicrobial agents and chemotherapy* **54**:3107-3112.
